# Supplementary material
Source: publisher figshare collection journal article supplement (https://sage.figshare.com/ndownloader/files/18038033)
Supplement: Supplementary file 1 [file 18038033]

**Supplementary material 3.** Univariate logistic regression models for factors associated with sustained participation in complex and social everyday activities between baseline and the 10-year follow-up in people mildly, moderately and severely affected by MS at baseline.

|                                   | Mild MS (n=142)   |                 | Moderate MS (n=84) |                 | Severe MS (n=38)  |                 |
|-----------------------------------|-------------------|-----------------|--------------------|-----------------|-------------------|-----------------|
|                                   | OR (95% CI)       | <i>P</i> -value | OR (95% CI)        | <i>P</i> -value | OR (95% CI)       | <i>P</i> -value |
| <i>Age</i>                        |                   |                 |                    |                 |                   |                 |
| <41 years                         | 1.12 (0.55–2.28)  | .756            | 0.66 (0.18–2.91)   | .658            | NA                |                 |
| ≥41 years                         | 1.00 (reference)  |                 | 1.00 (reference)   |                 |                   |                 |
| <i>Sex</i>                        |                   |                 |                    |                 |                   |                 |
| Male                              | 1.88 (0.83–4.26)  | .131            | 1.35 (0.50–3.67)   | .555            | 2.00 (0.11–34.82) | .634            |
| Female                            | 1.00 (reference)  |                 | 1.00 (reference)   |                 | 1.00 (reference)  |                 |
| <i>Living situation</i>           |                   |                 |                    |                 |                   |                 |
| Co-habiting                       | 1.13 (0.51–2.25)  | .760            | 0.83 (0.31–2.31)   | .726            | NA                |                 |
| Living alone                      | 1.00 (reference)  |                 | 1.00 (reference)   |                 |                   |                 |
| <i>Work status</i>                |                   |                 |                    |                 |                   |                 |
| Working                           | 1.02 (0.50–2.07)  | .959            | 0.60 (0.23–1.60)   | .309            | NA                |                 |
| Not working                       | 1.00 (reference)  |                 | 1.00 (reference)   |                 |                   |                 |
| <i>Education</i>                  |                   |                 |                    |                 |                   |                 |
| Higher education                  | 2.86 (1.32–6.16)  | .007            | 1.29 (0.46–3.60)   | .622            | 1.57 (0.09–27.21) | .756            |
| Basic education                   | 1.00 (reference)  |                 | 1.00 (reference)   |                 | 1.00 (reference)  |                 |
| <i>Immunomodulatory treatment</i> |                   |                 |                    |                 |                   |                 |
| Treatment                         | 0.92 (0.43–1.97)  | .828            | 0.77 (0.28–2.15)   | .622            | NA                |                 |
| No treatment                      | 1.00 (reference)  |                 | 1.00 (reference)   |                 |                   |                 |
| <i>MS type</i>                    |                   |                 |                    |                 |                   |                 |
| Relapsing MS                      | 2.23 (0.78–6.38)  | .134            | 0.59 (0.17–1.99)   | .393            | NA                |                 |
| Progressive MS                    | 1.00 (reference)  |                 | 1.00 (reference)   |                 |                   |                 |
| <i>Ambulation status</i>          |                   |                 |                    |                 |                   |                 |
| Community ambulators (≥1.2m/s)    | 5.93 (2.40–14.65) | <.001           | 0.93 (0.23–3.80)   | .919            | NA                |                 |
| Limited ambulators (0–1.2m/s)     | 1.00 (reference)  |                 | 1.00 (reference)   |                 |                   |                 |
| <i>Manual dexterity</i>           |                   |                 |                    |                 |                   |                 |
| NHPT ≥0.5 pgs/sec                 | 3.74 (0.85–16.39) | .080            | 2.89 (1.05–7.95)   | <b>.040</b>     | NA                |                 |
| NHPT <0.5 pgs/sec                 | 1.00 (reference)  |                 | 1.00 (reference)   |                 |                   |                 |
| <i>Cognition</i>                  |                   |                 |                    |                 |                   |                 |
| SDMT ≥32 correct responses        | 5.16 (2.12–12.57) | <b>&lt;.001</b> | 2.82 (1.04–7.66)   | <b>.042</b>     | NA                |                 |
| SDMT <32 correct responses        | 1.00 (reference)  |                 | 1.00 (reference)   |                 |                   |                 |
| <i>Mood</i>                       |                   |                 |                    |                 |                   |                 |
| BDI 0–12 points                   | 1.58 (0.66–3.75)  | .303            | 1.52 (0.48–4.77)   | .473            | 0.18 (0.01–3.47)  | .260            |
| BDI ≥13 points                    | 1.00 (reference)  |                 | 1.00 (reference)   |                 | 1.00 (reference)  |                 |

MS: multiple sclerosis; OR: odds ratio; NA: not applicable; NHPT: Nine-Hole Peg Test; SDMT: Symbol Digit Modalities Test; BDI: Beck Depression Inventory.
